# Supplementary material
Source: PubMed Central journal article supplement (PMC5272806)

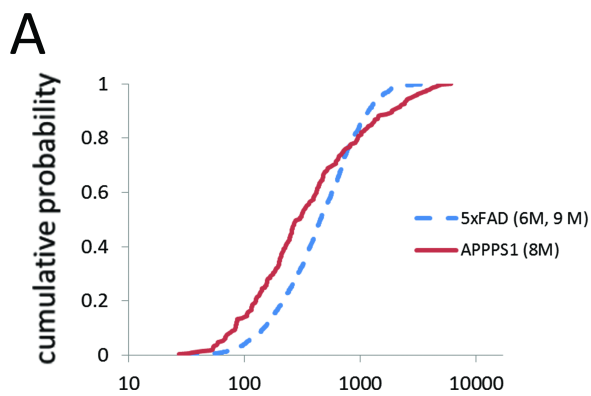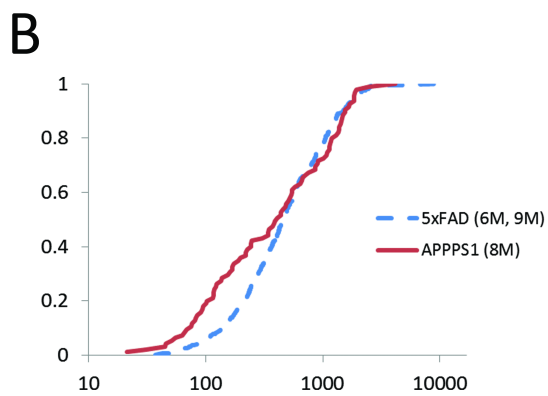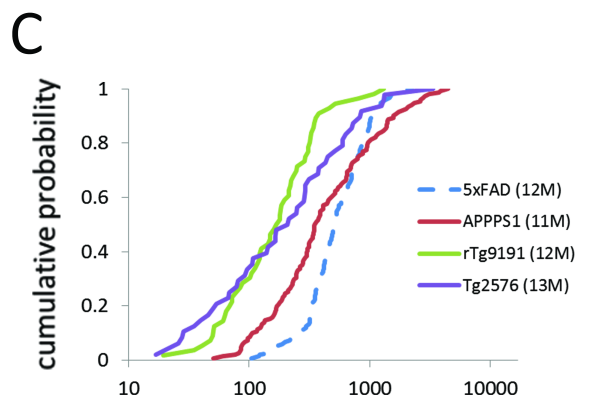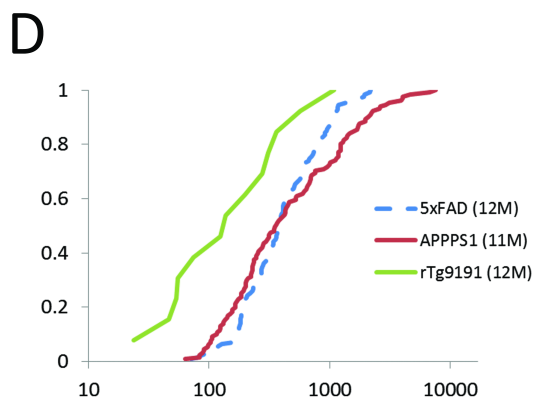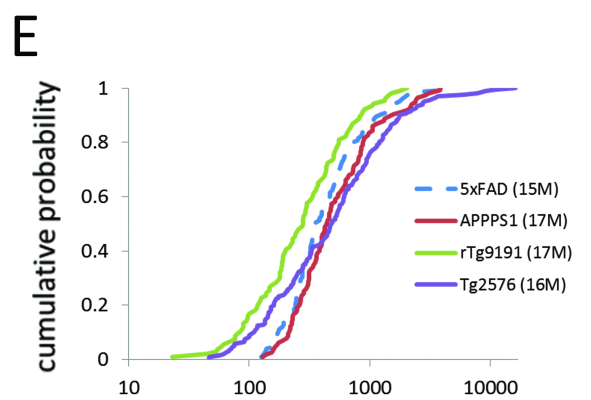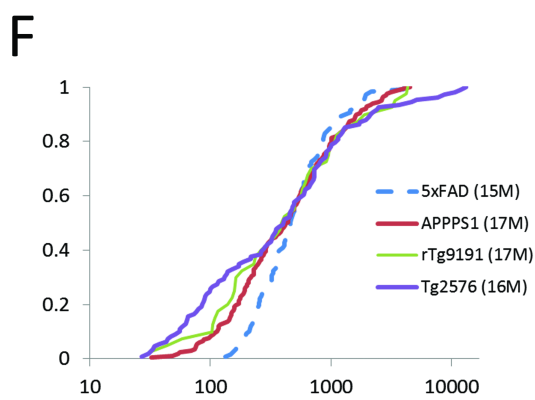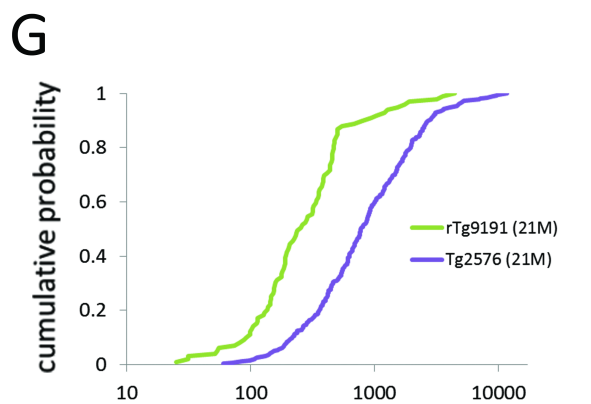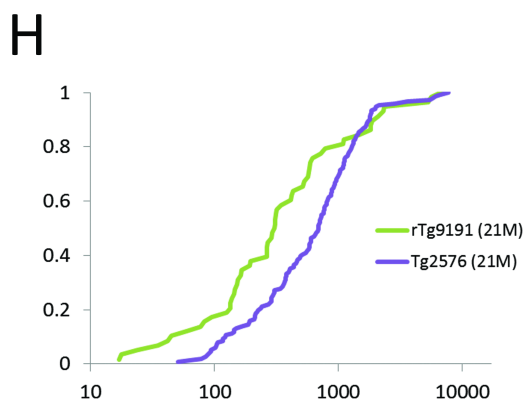

plaque area ( $\mu\text{m}^2$ )

plaque area ( $\mu\text{m}^2$ )

Supplement: NIHMS831056-supplement-supplemental_figure_1.pdf [file NIHMS831056-supplement-supplemental_figure_1.pdf]
